# Supplementary material for: Pathological Evidence for Residual SARS-CoV-2 in the Micrometastatic Niche of a Patient with Ovarian Cancer
Source: Curr Issues Mol Biol. 2022 Nov 26;44(12):5879–89. doi: 10.3390/cimb44120400 (PMC9776863; doi:10.3390/cimb44120400)
Supplement: Supplementary file 1 [file cimb-44-00400-s001.zip]

Archive with 4 entries (4 files):
- Enago-Certificate-TABUWJ-57..pdf
- f.Supplementary material.10.24.2022_INQ-6154161822_TABUWJ-53.pdf
- Form.09.08.2022.pdf
- Institutional Review Board Statement.pdf
